# Supplementary material for: Scoping Review of Climate Change Adaptation Interventions for Health: Implications for Policy and Practice
Source: Preprints.org preprint supplement (doi:10.20944/preprints202411.0542.v1), 2024-11-07
Supplement: Supplementary file 1 [file supplementary]

# Annex 1: Data extraction tool

| **Project name** |  |
| --- | --- |
| **Article reviewer** |  |
| **Article name** |  |
| **Eligibility** | **Include (actual intervention), include (review of interventions), exclude (not an adaptation study), exclude (not climate change), or query** |
| **Full citation** |  |
| **Article web link** |  |
| **Research problem addressed by article or main topic covered** |  |
| **Study objective** |  |
| **Geographic region of study** |  |
| **Population group** |  |
| **Temporal focus [date of study, or season if relevant]** |  |
| **Describe the intervention(s)** |  |
| **Methods used to evaluate the outcome** |  |
| **Main results, including any negative or unintended findings** |  |
| **Conclusions** |  |
| **Inequities reported** |  |
