# Supplementary material for: Scoping Review of Climate Change Adaptation Interventions for Health: Implications for Policy and Practice
Source: Preprints.org preprint supplement (doi:10.20944/preprints202411.0542.v1), 2024-11-07

Distribution of Articles by Project Name

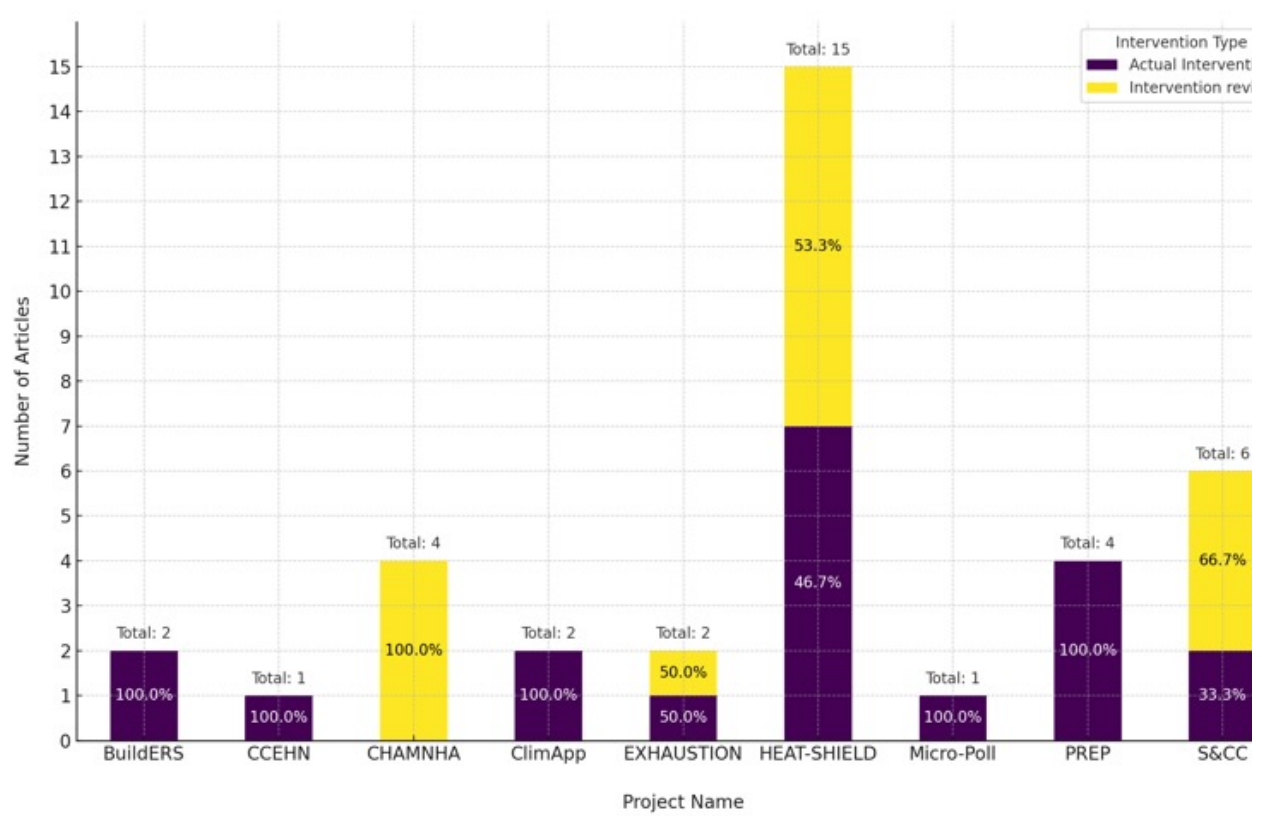

Distribution of Articles by Study Methods

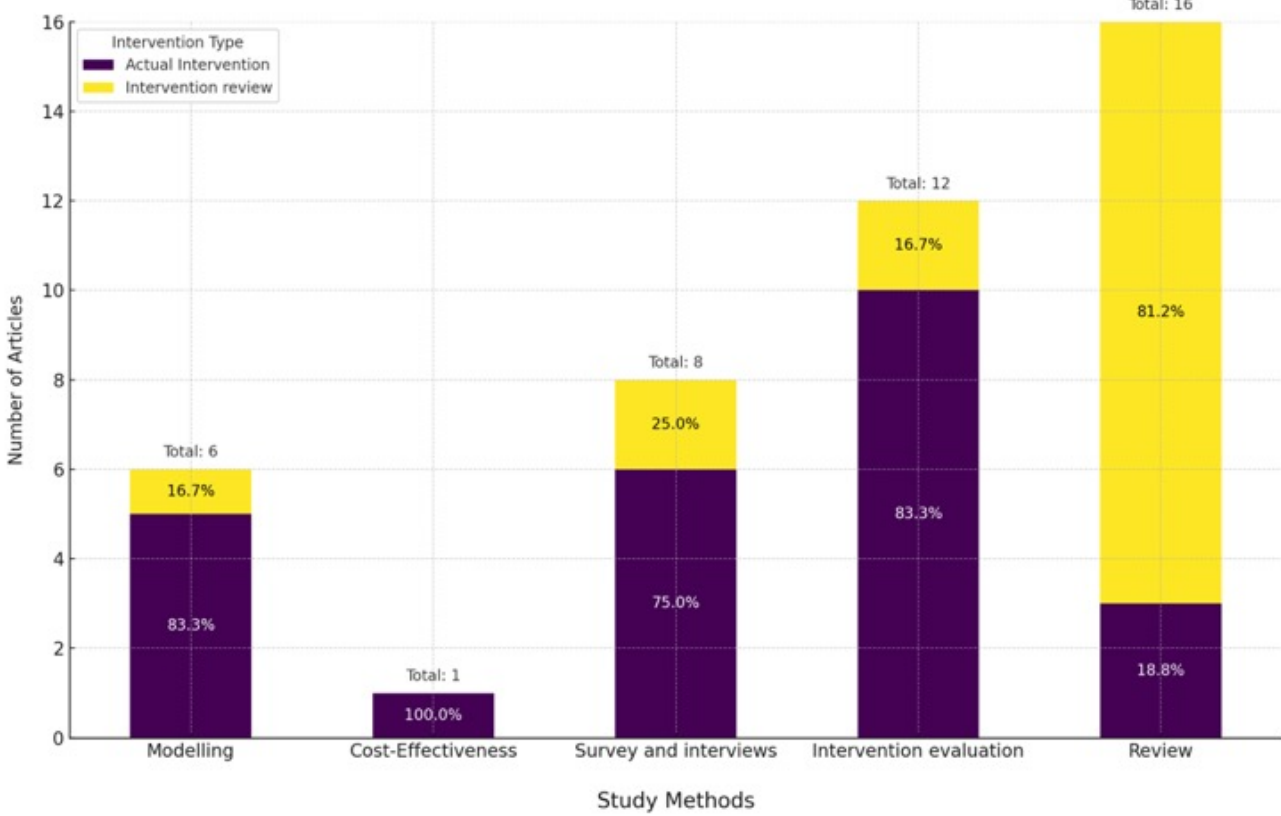

Timeline of Studies by Year of Publication

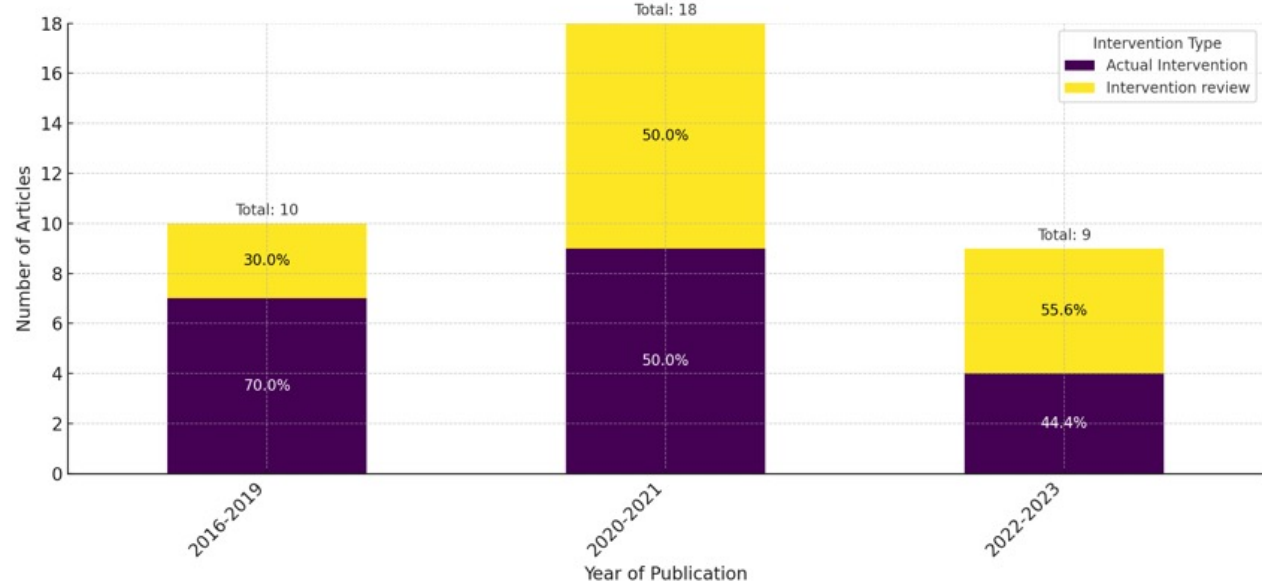

Distribution of Articles by Population Group

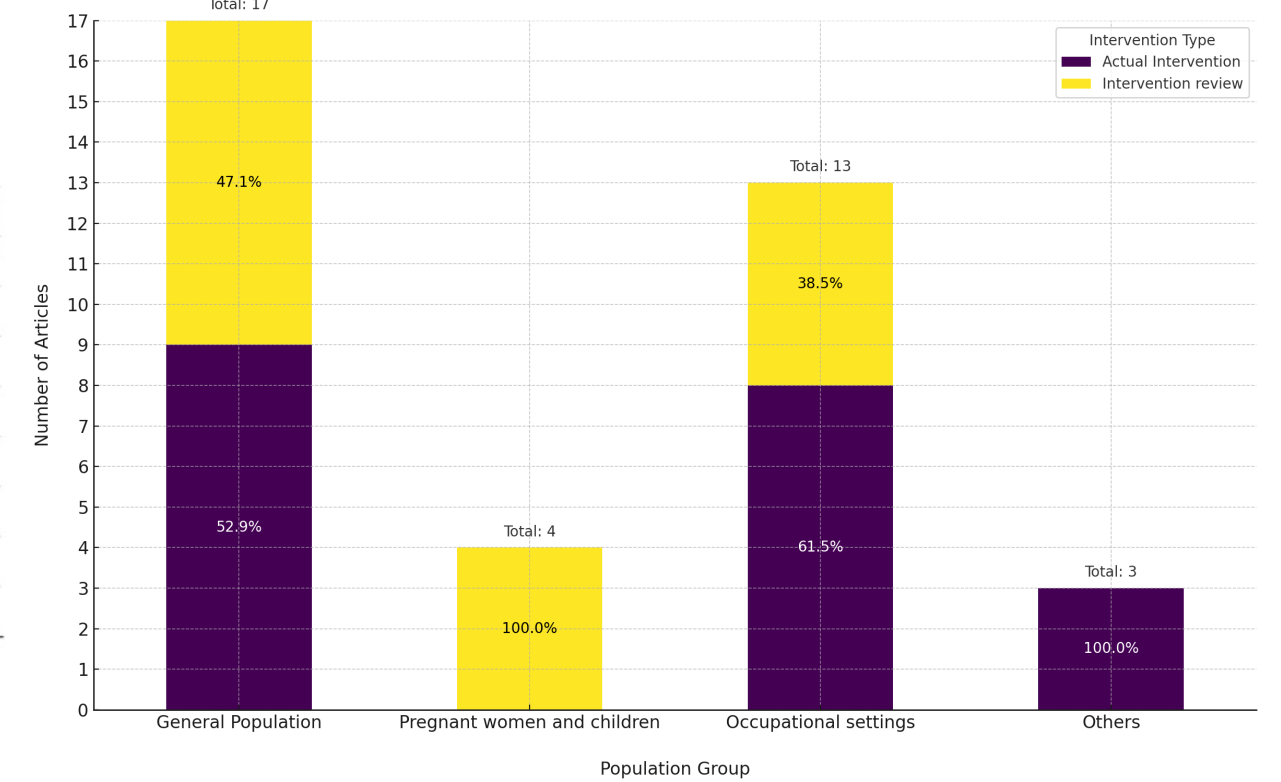

Distribution of Articles by Type of Exposure

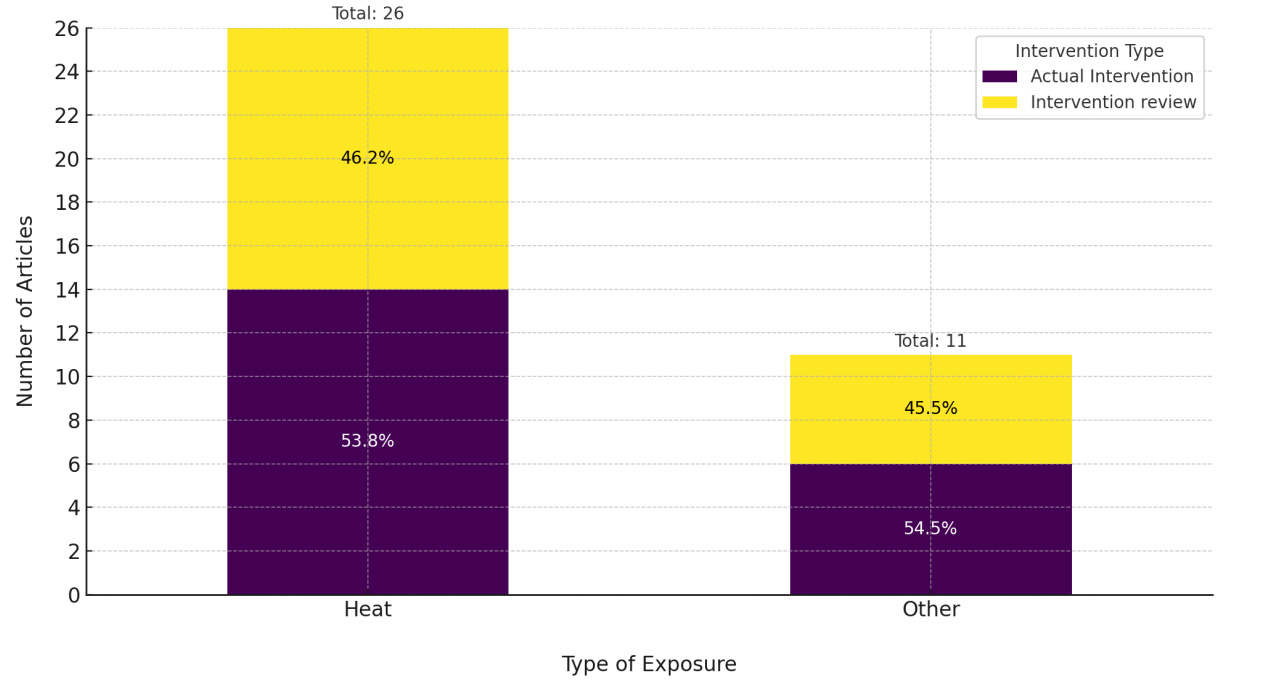

Distribution of Articles by Adaptation Topic

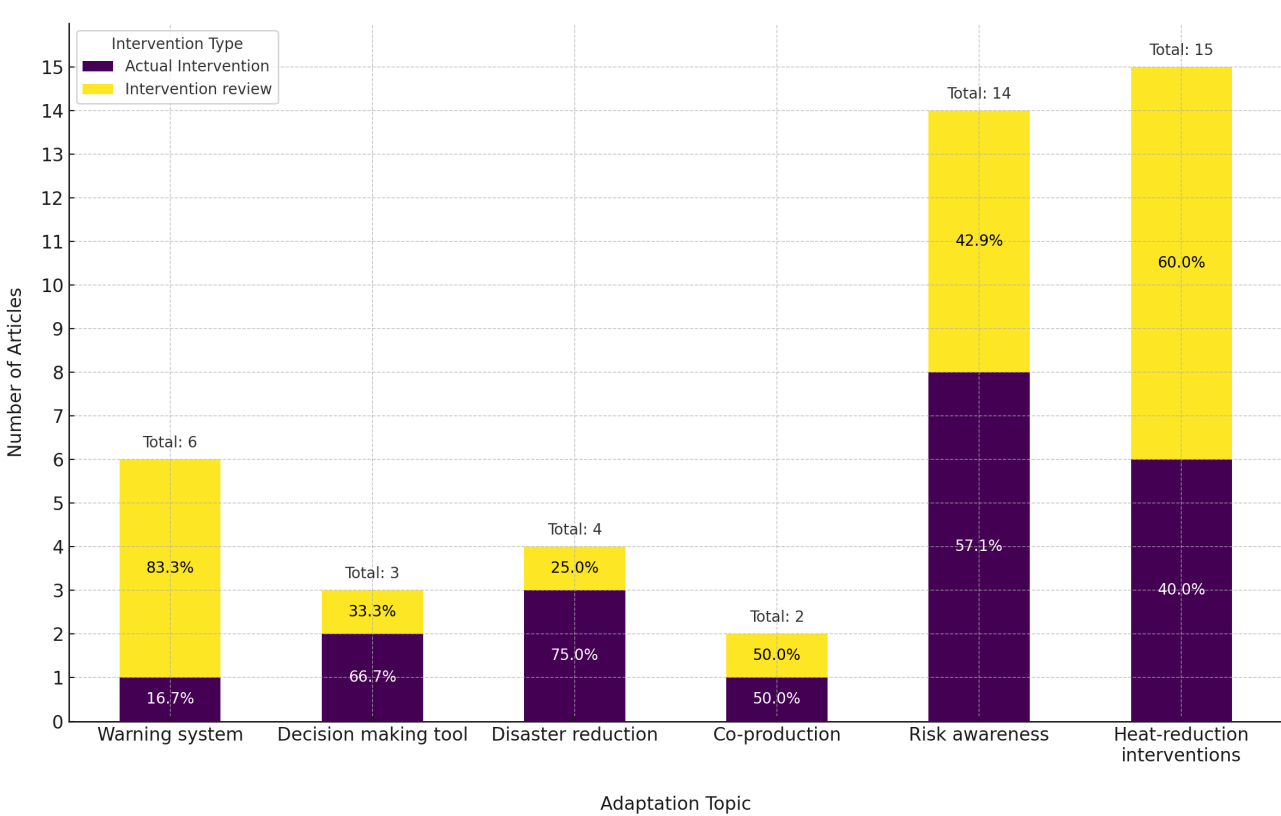

Supplement: Supplementary file 2 [file supplementary]
